# Supplementary material for: Social determinants of pertussis and influenza vaccine uptake in pregnancy: a national cohort study in England using electronic health records
Source: PubMed Central journal article supplement (PMC8217954; doi:10.1136/bmjopen-2020-046545), 2021-06-21
Supplement: bmjopen-2020-046545supp001.pdf [file bmjopen-2020-046545supp001.pdf]

## Supplementary material

### **Social determinants of pertussis and influenza vaccine uptake in pregnancy: a national cohort study using electronic health records**

**Authors:** Jemma L Walker,\* Christopher T Rentsch,\* Helen I McDonald, Jeongeun Bak, Caroline Minassian, Gayatri Amirthalingam, Michael Edelstein, Sara L Thomas.

#### **Supplementary Table 1: Hierarchical conceptual framework and interpretation of effect estimates**

#### **Supplementary Table 2: Patterns of social factors amongst pregnant women with and without a recorded ethnicity status, 2010-2015**

#### **Supplementary Table 3: 'Pertussis BMI Model' complete case analysis additionally excluding 6,666 women with missing BMI for pertussis vaccine uptake amongst pregnant women in the UK, 2012-2015**

#### **Supplementary Table 4: 'Influenza BMI Model' complete case analysis additionally excluding 13,874 women with missing BMI for influenza vaccine uptake amongst pregnant women in the UK, 2010-2015**

#### **Supplementary Table 5: Sensitivity analyses expanding definition of inclusion criteria for the pertussis vaccine uptake models: registration by end of pregnancy and ImmForm approach compared to primary analyses**

#### **Supplementary Table 7: Secondary analysis of subsequent pertussis vaccine uptake among women who had received pertussis vaccination in their first eligible pregnancy and had a second eligible pregnancy within the study period (N=3,111)**

### Supplementary Table 1: Hierarchical conceptual framework and interpretation of effect estimates

This table is reproduced from Supplementary Table 6 in Jain A., Walker JL, Forbes H, Langan S, Smeeth L, van Hoek AJ and Thomas SL. Zoster vaccination inequalities: A population based cohort study using linked data from the UK Clinical Practice Research Datalink. PLoS One 2018;13(11):e0207183. doi: 10.1371/journal.pone.0207183.

(based on [1])

| Hierarchical models        | Explanatory variables                                                                                | Interpretation of effect estimates                                                                                                                                                                                                                                              |
|----------------------------|------------------------------------------------------------------------------------------------------|---------------------------------------------------------------------------------------------------------------------------------------------------------------------------------------------------------------------------------------------------------------------------------|
| 'Minimally' adjusted model | Each explanatory variable adjusted in-turn for <i>a priori</i> confounders: year of birth and gender | Effect estimate of each variable adjusted for <i>a priori</i> confounders.                                                                                                                                                                                                      |
| Model-1 <sup>^</sup>       | Ethnicity +immigration status <sup>^</sup> with <i>a priori</i> confounders                          | Effects of ethnicity and immigration status adjusted for each other and <i>a priori</i> confounders                                                                                                                                                                             |
| Model-2 <sup>*</sup>       | Model-1+ patient-LSOA-level deprivation <sup>#</sup>                                                 | (i) Effects of ethnicity and immigration status not mediated via deprivation and adjusted for each other and <i>a priori</i> confounders<br>(ii) Effect of patient-LSOA-level deprivation adjusted for <i>a priori</i> confounders, ethnicity and immigration status            |
| Model-3 <sup>*</sup>       | Model-2 + rest of the explanatory variables~                                                         | (i) Effect of ethnicity and immigration status not mediated via deprivation and other explanatory variables~ <sup>*</sup><br>(ii) Effect of deprivation not mediated via other explanatory variables~ <sup>*</sup><br>(iii) Effect of other explanatory variables~ <sup>*</sup> |

\*all variables in the model adjusted for each other and *a priori* confounders: year of birth, sex and calendar period <sup>^</sup>ethnicity and immigration status examined for multicollinearity LSOA Lower-layer Super Output Area <sup>#</sup> patient-LSOA-level and practice-LSOA-level deprivation were considered to be correlated therefore only patient-LSOA-level deprivation used ~ care home residence, living alone status and cohabitation status (living alone and cohabitation examined for multicollinearity)

1. Victora CG, Huttly SR, Fuchs SC, Olinto MT. The role of conceptual frameworks in epidemiological analysis: a hierarchical approach. Int J Epidemiol. 1997;26(1):224-7. PubMed PMID: 9126524.

**Supplementary Table 2: Patterns of social factors amongst pregnant women with and without a recorded ethnicity status, 2010-2015**

|                                              |                        | Pertussis          |                   | Influenza          |                   |
|----------------------------------------------|------------------------|--------------------|-------------------|--------------------|-------------------|
|                                              |                        | Recorded ethnicity | Missing ethnicity | Recorded ethnicity | Missing ethnicity |
|                                              |                        | n=62,537           | n=5,553           | n=140,141          | n=11,991          |
| Year/season                                  | 2010                   | -                  | -                 | 34,373 (24.5%)     | 2,433 (20.3%)     |
|                                              | 2011                   | -                  | -                 | 32,258 (23.0%)     | 2,228 (18.6%)     |
|                                              | 2012                   | 6,717 (10.7%)      | 506 (9.1%)        | 26,750 (19.1%)     | 1,791 (14.9%)     |
|                                              | 2013                   | 24,657 (39.4%)     | 1,789 (32.2%)     | 21,029 (15.0%)     | 1,730 (14.4%)     |
|                                              | 2014                   | 20,148 (32.2%)     | 1,910 (34.4%)     | 15,712 (11.2%)     | 1,882 (15.7%)     |
|                                              | 2015                   | 11,015 (17.6%)     | 1,348 (24.3%)     | 10,019 (7.1%)      | 1,927 (16.1%)     |
| Index of multiple deprivation (IMD) quintile | Least deprived         | 13,285 (21.2%)     | 1,522 (27.4%)     | 28,956 (20.7%)     | 3,203 (26.7%)     |
|                                              | 2                      | 11,335 (18.1%)     | 883 (15.9%)       | 25,424 (18.1%)     | 1,896 (15.8%)     |
|                                              | 3                      | 12,933 (20.7%)     | 992 (17.9%)       | 29,368 (21.0%)     | 2,245 (18.7%)     |
|                                              | 4                      | 12,973 (20.7%)     | 1,592 (28.7%)     | 28,520 (20.4%)     | 3,265 (27.2%)     |
|                                              | Most deprived          | 12,011 (19.2%)     | 564 (10.2%)       | 27,873 (19.9%)     | 1,382 (11.5%)     |
| Region                                       | London                 | 11,894 (19.0%)     | 502 (9.0%)        | 26,171 (18.7%)     | 1,144 (9.5%)      |
|                                              | North East             | 1,185 (1.9%)       | 60 (1.1%)         | 2,758 (2.0%)       | 173 (1.4%)        |
|                                              | North West             | 8,835 (14.1%)      | 917 (16.5%)       | 19,060 (13.6%)     | 1,761 (14.7%)     |
|                                              | Yorkshire & The Humber | 1,000 (1.6%)       | 5 (0.1%)          | 2,840 (2.0%)       | 24 (0.2%)         |
|                                              | East Midlands          | 326 (0.5%)         | 70 (1.3%)         | 1,940 (1.4%)       | 435 (3.6%)        |
|                                              | West Midlands          | 7,050 (11.3%)      | 530 (9.5%)        | 15,846 (11.3%)     | 1,231 (10.3%)     |
|                                              | East of England        | 5,568 (8.9%)       | 464 (8.4%)        | 13,695 (9.8%)      | 1,025 (8.5%)      |
|                                              | South West             | 7,002 (11.2%)      | 223 (4.0%)        | 16,546 (11.8%)     | 574 (4.8%)        |
|                                              | South Central          | 10,381 (16.6%)     | 1,692 (30.5%)     | 21,435 (15.3%)     | 3,215 (26.8%)     |
|                                              | South East Coast       | 9,296 (14.9%)      | 1,090 (19.6%)     | 19,850 (14.2%)     | 2,409 (20.1%)     |
| Ethnicity                                    | White                  | 52,598 (84.1%)     | -                 | 117,469 (83.8%)    | -                 |
|                                              | South Asian            | 4,692 (7.5%)       | -                 | 10,827 (7.7%)      | -                 |
|                                              | Black                  | 2,583 (4.1%)       | -                 | 5,853 (4.2%)       | -                 |
|                                              | Mixed                  | 922 (1.5%)         | -                 | 2,094 (1.5%)       | -                 |
|                                              | Other                  | 1,742 (2.8%)       | -                 | 3,898 (2.8%)       | -                 |
| Maternal age, years                          | <20                    | 2,079 (3.3%)       | 218 (3.9%)        | 5,536 (4.0%)       | 583 (4.9%)        |
|                                              | 20-24                  | 8,848 (14.1%)      | 914 (16.5%)       | 21,663 (15.5%)     | 2,014 (16.8%)     |
|                                              | 25-29                  | 16,696 (26.7%)     | 1,391 (25.0%)     | 37,985 (27.1%)     | 3,004 (25.1%)     |
|                                              | 30-35                  | 20,294 (32.5%)     | 1,673 (30.1%)     | 43,777 (31.2%)     | 3,639 (30.3%)     |
|                                              | ≥35                    | 14,620 (23.4%)     | 1,357 (24.4%)     | 31,180 (22.2%)     | 2,751 (22.9%)     |
| Number of children                           | 0                      | 26,622 (42.6%)     | 2,645 (47.6%)     | 66,112 (47.2%)     | 6,255 (52.2%)     |
|                                              | 1                      | 22,132 (35.4%)     | 1,675 (30.2%)     | 45,969 (32.8%)     | 3,312 (27.6%)     |
|                                              | 2                      | 8,645 (13.8%)      | 679 (12.2%)       | 18,192 (13.0%)     | 1,431 (11.9%)     |
|                                              | ≥3                     | 5,138 (8.2%)       | 554 (10.0%)       | 9,868 (7.0%)       | 993 (8.3%)        |
| Clinical risk group                          | No                     | -                  | -                 | 130,160 (92.9%)    | 11,238 (93.7%)    |
|                                              | Yes                    | -                  | -                 | 9,981 (7.1%)       | 753 (6.3%)        |
| Body mass index (BMI)                        | <18.5                  | 2,063 (3.3%)       | 201 (3.6%)        | 4,865 (3.5%)       | 434 (3.6%)        |
|                                              | 18.5-24.9              | 29,045 (46.4%)     | 2,489 (44.8%)     | 66,405 (47.4%)     | 5,571 (46.5%)     |
|                                              | 25.0-29.9              | 14,211 (22.7%)     | 1,203 (21.7%)     | 31,855 (22.7%)     | 2,563 (21.4%)     |
|                                              | ≥30                    | 10,552 (16.9%)     | 785 (14.1%)       | 23,142 (16.5%)     | 1,747 (14.6%)     |
|                                              | Missing                | 6,666 (10.7%)      | 875 (15.8%)       | 13,874 (9.9%)      | 1,676 (14.0%)     |

Note: all p&lt;0.001

**Supplementary Table 3: 'Pertussis BMI Model' complete case analysis additionally excluding 6,666 women with missing BMI for pertussis vaccine uptake amongst pregnant women in the UK, 2012-2015**

|                                                                                                        |                        | Minimally adjusted for year | Model 3 (fully adjusted in main analysis)<br>Adjusted for year, IMD, region, ethnicity, maternal age and number of children | BMI Model<br>As Model 3 and additionally adjusted for BMI |
|--------------------------------------------------------------------------------------------------------|------------------------|-----------------------------|-----------------------------------------------------------------------------------------------------------------------------|-----------------------------------------------------------|
| N                                                                                                      |                        | 55,871                      | 55,871                                                                                                                      | 55,871                                                    |
| Year                                                                                                   | 2012                   | 1                           | 1                                                                                                                           | 1                                                         |
|                                                                                                        | 2013                   | 1.65 (1.56, 1.75)           | 1.74 (1.63, 1.84)                                                                                                           | 1.74 (1.63, 1.84)                                         |
|                                                                                                        | 2014                   | 1.63 (1.54, 1.73)           | 1.70 (1.60, 1.81)                                                                                                           | 1.70 (1.60, 1.81)                                         |
|                                                                                                        | 2015                   | 1.95 (1.82, 2.08)           | 2.04 (1.90, 2.19)                                                                                                           | 2.04 (1.91, 2.19)                                         |
| Index of multiple deprivation (IMD) quintile                                                           | Least deprived         | 1                           | 1                                                                                                                           | 1                                                         |
|                                                                                                        | 2                      | 0.78 (0.73, 0.83)           | 0.81 (0.76, 0.86)                                                                                                           | 0.81 (0.76, 0.86)                                         |
|                                                                                                        | 3                      | 0.67 (0.64, 0.71)           | 0.72 (0.68, 0.77)                                                                                                           | 0.72 (0.68, 0.77)                                         |
|                                                                                                        | 4                      | 0.54 (0.51, 0.58)           | 0.63 (0.59, 0.67)                                                                                                           | 0.63 (0.59, 0.67)                                         |
|                                                                                                        | Most deprived          | 0.44 (0.41, 0.46)           | 0.53 (0.50, 0.57)                                                                                                           | 0.54 (0.50, 0.57)                                         |
| Region                                                                                                 | London                 | 1                           | 1                                                                                                                           | 1                                                         |
|                                                                                                        | North East             | 0.96 (0.84, 1.10)           | 1.12 (0.98, 1.29)                                                                                                           | 1.12 (0.97, 1.28)                                         |
|                                                                                                        | North West             | 1.30 (1.22, 1.38)           | 1.36 (1.28, 1.46)                                                                                                           | 1.36 (1.28, 1.46)                                         |
|                                                                                                        | Yorkshire & The Humber | 1.49 (1.29, 1.72)           | 1.51 (1.30, 1.76)                                                                                                           | 1.51 (1.30, 1.76)                                         |
|                                                                                                        | East Midlands          | 1.87 (1.44, 2.42)           | 2.33 (1.78, 3.04)                                                                                                           | 2.31 (1.77, 3.02)                                         |
|                                                                                                        | West Midlands          | 1.60 (1.50, 1.71)           | 1.70 (1.59, 1.83)                                                                                                           | 1.70 (1.58, 1.82)                                         |
|                                                                                                        | East of England        | 1.73 (1.60, 1.86)           | 1.56 (1.44, 1.68)                                                                                                           | 1.56 (1.44, 1.68)                                         |
|                                                                                                        | South West             | 1.41 (1.32, 1.51)           | 1.42 (1.33, 1.53)                                                                                                           | 1.42 (1.33, 1.53)                                         |
|                                                                                                        | South Central          | 1.46 (1.37, 1.55)           | 1.29 (1.21, 1.37)                                                                                                           | 1.29 (1.21, 1.37)                                         |
| South East Coast                                                                                       | 1.33 (1.26, 1.42)      | 1.18 (1.11, 1.26)           | 1.18 (1.11, 1.26)                                                                                                           |                                                           |
| Ethnicity                                                                                              | White                  | 1                           | 1                                                                                                                           | 1                                                         |
|                                                                                                        | South Asian            | 0.74 (0.70, 0.79)           | 0.83 (0.77, 0.89)                                                                                                           | 0.83 (0.77, 0.89)                                         |
|                                                                                                        | Black                  | 0.45 (0.41, 0.49)           | 0.62 (0.57, 0.68)                                                                                                           | 0.62 (0.56, 0.67)                                         |
|                                                                                                        | Mixed                  | 0.69 (0.60, 0.79)           | 0.75 (0.65, 0.87)                                                                                                           | 0.75 (0.65, 0.87)                                         |
|                                                                                                        | Other                  | 0.63 (0.57, 0.70)           | 0.67 (0.60, 0.75)                                                                                                           | 0.68 (0.61, 0.75)                                         |
| Maternal age, years                                                                                    | <20                    | 0.85 (0.75, 0.96)           | 0.84 (0.74, 0.96)                                                                                                           | 0.85 (0.75, 0.97)                                         |
|                                                                                                        | 20-24                  | 1                           | 1                                                                                                                           | 1                                                         |
|                                                                                                        | 25-29                  | 1.27 (1.20, 1.34)           | 1.28 (1.20, 1.36)                                                                                                           | 1.27 (1.20, 1.35)                                         |
|                                                                                                        | 30-35                  | 1.49 (1.41, 1.58)           | 1.51 (1.42, 1.60)                                                                                                           | 1.49 (1.41, 1.58)                                         |
|                                                                                                        | ≥35                    | 1.32 (1.24, 1.40)           | 1.37 (1.29, 1.46)                                                                                                           | 1.36 (1.28, 1.45)                                         |
| Number of children                                                                                     | 0                      | 1                           | 1                                                                                                                           | 1                                                         |
|                                                                                                        | 1                      | 0.67 (0.65, 0.70)           | 0.66 (0.63, 0.68)                                                                                                           | 0.66 (0.63, 0.68)                                         |
|                                                                                                        | 2                      | 0.47 (0.44, 0.49)           | 0.47 (0.45, 0.50)                                                                                                           | 0.47 (0.45, 0.50)                                         |
|                                                                                                        | ≥3                     | 0.35 (0.33, 0.38)           | 0.37 (0.35, 0.40)                                                                                                           | 0.37 (0.35, 0.40)                                         |
| Body mass index (BMI)                                                                                  | <18.5                  | 0.71 (0.64, 0.77)           |                                                                                                                             | 0.77 (0.70, 0.85)                                         |
|                                                                                                        | 18.5-24.9              | 1                           |                                                                                                                             | 1                                                         |
|                                                                                                        | 25.0-29.9              | 1.01 (0.96, 1.05)           |                                                                                                                             | 1.10 (1.05, 1.15)                                         |
|                                                                                                        | ≥30                    | 0.82 (0.78, 0.86)           |                                                                                                                             | 0.96 (0.91, 1.00)                                         |
| Note: Model inclusion as per the main analysis but additionally excluding 6,666 women with missing BMI |                        |                             |                                                                                                                             |                                                           |

**Supplementary Table 4: 'Influenza BMI Model' complete case analysis additionally excluding 13,874 women with missing BMI for influenza vaccine uptake amongst pregnant women in the UK, 2010-2015**

|                                              |                        | Minimally adjusted for year | Model 4 adjusted for year, IMD, region, ethnicity, maternal age, number of children and clinical risk group | BMI Model as Model 4 and additionally adjusted for BMI |
|----------------------------------------------|------------------------|-----------------------------|-------------------------------------------------------------------------------------------------------------|--------------------------------------------------------|
| N                                            |                        | 126,267                     | 126,267                                                                                                     | 126,267                                                |
| Year                                         | 2010                   | 1                           | 1                                                                                                           | 1                                                      |
|                                              | 2011                   | 0.90 (0.87, 0.93)           | 0.90 (0.87, 0.93)                                                                                           | 0.90 (0.87, 0.93)                                      |
|                                              | 2012                   | 1.63 (1.57, 1.68)           | 1.64 (1.59, 1.70)                                                                                           | 1.64 (1.59, 1.70)                                      |
|                                              | 2013                   | 1.41 (1.36, 1.46)           | 1.41 (1.35, 1.46)                                                                                           | 1.40 (1.35, 1.46)                                      |
|                                              | 2014                   | 1.70 (1.63, 1.77)           | 1.70 (1.63, 1.77)                                                                                           | 1.70 (1.63, 1.77)                                      |
|                                              | 2015                   | 1.66 (1.58, 1.74)           | 1.67 (1.60, 1.76)                                                                                           | 1.67 (1.59, 1.76)                                      |
| Index of multiple deprivation (IMD) quintile | Least deprived         | 1                           | 1                                                                                                           | 1                                                      |
|                                              | 2                      | 0.90 (0.87, 0.94)           | 0.92 (0.89, 0.95)                                                                                           | 0.92 (0.88, 0.95)                                      |
|                                              | 3                      | 0.83 (0.80, 0.86)           | 0.87 (0.84, 0.90)                                                                                           | 0.86 (0.83, 0.90)                                      |
|                                              | 4                      | 0.71 (0.69, 0.74)           | 0.76 (0.73, 0.79)                                                                                           | 0.75 (0.73, 0.78)                                      |
|                                              | Most deprived          | 0.68 (0.65, 0.70)           | 0.72 (0.69, 0.75)                                                                                           | 0.71 (0.69, 0.74)                                      |
| Region                                       | London                 | 1                           | 1                                                                                                           | 1                                                      |
|                                              | North East             | 1.17 (1.07, 1.28)           | 1.26 (1.15, 1.37)                                                                                           | 1.25 (1.14, 1.37)                                      |
|                                              | North West             | 1.40 (1.34, 1.45)           | 1.43 (1.37, 1.49)                                                                                           | 1.43 (1.37, 1.49)                                      |
|                                              | Yorkshire & The Humber | 1.28 (1.18, 1.39)           | 1.26 (1.16, 1.37)                                                                                           | 1.25 (1.15, 1.36)                                      |
|                                              | East Midlands          | 1.29 (1.17, 1.43)           | 1.35 (1.22, 1.49)                                                                                           | 1.34 (1.21, 1.49)                                      |
|                                              | West Midlands          | 1.41 (1.35, 1.47)           | 1.44 (1.37, 1.50)                                                                                           | 1.43 (1.37, 1.49)                                      |
|                                              | East of England        | 1.30 (1.24, 1.36)           | 1.23 (1.17, 1.28)                                                                                           | 1.22 (1.17, 1.28)                                      |
|                                              | South West             | 1.29 (1.23, 1.34)           | 1.28 (1.22, 1.34)                                                                                           | 1.27 (1.22, 1.33)                                      |
|                                              | South Central          | 1.45 (1.39, 1.51)           | 1.35 (1.30, 1.41)                                                                                           | 1.35 (1.29, 1.40)                                      |
|                                              | South East Coast       | 1.08 (1.04, 1.12)           | 1.03 (0.99, 1.07)                                                                                           | 1.03 (0.99, 1.07)                                      |
| Ethnicity                                    | White                  | 1                           | 1                                                                                                           | 1                                                      |
|                                              | South Asian            | 0.90 (0.87, 0.94)           | 0.99 (0.95, 1.03)                                                                                           | 0.99 (0.95, 1.04)                                      |
|                                              | Black                  | 0.66 (0.62, 0.70)           | 0.83 (0.78, 0.88)                                                                                           | 0.82 (0.77, 0.87)                                      |
|                                              | Mixed                  | 0.85 (0.78, 0.94)           | 0.92 (0.84, 1.01)                                                                                           | 0.92 (0.84, 1.01)                                      |
|                                              | Other                  | 0.78 (0.73, 0.84)           | 0.86 (0.80, 0.92)                                                                                           | 0.87 (0.80, 0.93)                                      |
| Maternal age, years                          | <20                    | 0.90 (0.84, 0.98)           | 0.90 (0.83, 0.97)                                                                                           | 0.91 (0.84, 0.98)                                      |
|                                              | 20-24                  | 1                           | 1                                                                                                           | 1                                                      |
|                                              | 25-29                  | 1.12 (1.08, 1.16)           | 1.11 (1.07, 1.15)                                                                                           | 1.11 (1.07, 1.15)                                      |
|                                              | 30-35                  | 1.20 (1.16, 1.24)           | 1.19 (1.15, 1.23)                                                                                           | 1.19 (1.14, 1.23)                                      |
|                                              | ≥35                    | 1.14 (1.10, 1.18)           | 1.15 (1.11, 1.20)                                                                                           | 1.15 (1.10, 1.19)                                      |
| Number of children                           | 0                      | 1                           | 1                                                                                                           | 1                                                      |
|                                              | 1                      | 0.80 (0.78, 0.82)           | 0.79 (0.77, 0.81)                                                                                           | 0.79 (0.77, 0.81)                                      |
|                                              | 2                      | 0.70 (0.68, 0.73)           | 0.71 (0.68, 0.73)                                                                                           | 0.70 (0.68, 0.73)                                      |
|                                              | ≥3                     | 0.61 (0.58, 0.64)           | 0.62 (0.59, 0.66)                                                                                           | 0.62 (0.59, 0.65)                                      |
| Clinical risk group                          | No                     | 1                           | 1                                                                                                           | 1                                                      |
|                                              | Yes                    | 1.69 (1.62, 1.76)           | 1.69 (1.62, 1.77)                                                                                           | 1.68 (1.61, 1.76)                                      |
| Body mass index (BMI)                        | <18.5                  | 0.85 (0.80, 0.90)           |                                                                                                             | 0.89 (0.84, 0.95)                                      |
|                                              | 18.5-24.9              | 1                           |                                                                                                             | 1                                                      |
|                                              | 25.0-29.9              | 1.04 (1.01, 1.07)           |                                                                                                             | 1.07 (1.04, 1.10)                                      |
|                                              | ≥30                    | 1.00 (0.97, 1.03)           |                                                                                                             | 1.06 (1.03, 1.09)                                      |

Note: Model inclusion as per the main analysis but additionally excluding 13,874 women with missing BMI

**Supplementary Table 5: Sensitivity analyses expanding definition of inclusion criteria for the pertussis vaccine uptake models: registration by end of pregnancy and ImmForm approach compared to primary analyses**

|                                              |                        | Primary analyses   |                   | Registered by end of pregnancy |                   | ImmForm approach   |                   |
|----------------------------------------------|------------------------|--------------------|-------------------|--------------------------------|-------------------|--------------------|-------------------|
|                                              |                        | Minimally adjusted | Fully adjusted    | Minimally adjusted             | Fully adjusted    | Minimally adjusted | Fully adjusted    |
| N                                            |                        | 62,537             | 62,537            | 80,831                         | 80,831            | 90,720             | 90,720            |
| Year                                         | 2012                   | 1                  | 1                 | 1                              | 1                 | 1                  | 1                 |
|                                              | 2013                   | 1.62 (1.53, 1.71)  | 1.69 (1.60, 1.79) | 1.59 (1.52, 1.67)              | 1.65 (1.58, 1.73) | 1.55 (1.48, 1.62)  | 1.60 (1.53, 1.67) |
|                                              | 2014                   | 1.60 (1.51, 1.69)  | 1.66 (1.57, 1.76) | 1.69 (1.61, 1.77)              | 1.72 (1.64, 1.81) | 1.64 (1.57, 1.72)  | 1.67 (1.60, 1.75) |
|                                              | 2015                   | 1.94 (1.82, 2.07)  | 2.03 (1.90, 2.17) | 2.09 (1.98, 2.21)              | 2.13 (2.02, 2.26) | 2.04 (1.94, 2.15)  | 2.07 (1.96, 2.19) |
| Index of multiple deprivation (IMD) quintile | Least deprived         | 1                  | 1                 | 1                              | 1                 | 1                  | 1                 |
|                                              | 2                      | 0.78 (0.74, 0.83)  | 0.81 (0.76, 0.86) | 0.79 (0.76, 0.83)              | 0.83 (0.79, 0.87) | 0.79 (0.76, 0.83)  | 0.83 (0.79, 0.87) |
|                                              | 3                      | 0.68 (0.64, 0.71)  | 0.73 (0.69, 0.77) | 0.71 (0.68, 0.74)              | 0.78 (0.74, 0.81) | 0.70 (0.67, 0.73)  | 0.76 (0.73, 0.80) |
|                                              | 4                      | 0.54 (0.52, 0.57)  | 0.64 (0.60, 0.67) | 0.58 (0.56, 0.61)              | 0.69 (0.66, 0.73) | 0.58 (0.56, 0.61)  | 0.69 (0.66, 0.72) |
|                                              | Most deprived          | 0.43 (0.41, 0.46)  | 0.54 (0.51, 0.57) | 0.46 (0.44, 0.49)              | 0.59 (0.56, 0.62) | 0.46 (0.44, 0.48)  | 0.58 (0.55, 0.60) |
| Region                                       | London                 | 1                  | 1                 | 1                              | 1                 | 1                  | 1                 |
|                                              | North East             | 0.91 (0.81, 1.03)  | 1.04 (0.92, 1.19) | 1.01 (0.90, 1.13)              | 1.17 (1.05, 1.32) | 1.03 (0.93, 1.15)  | 1.21 (1.08, 1.35) |
|                                              | North West             | 1.29 (1.22, 1.36)  | 1.36 (1.27, 1.44) | 1.31 (1.25, 1.38)              | 1.41 (1.34, 1.49) | 1.30 (1.24, 1.36)  | 1.40 (1.34, 1.48) |
|                                              | Yorkshire & The Humber | 1.51 (1.31, 1.74)  | 1.54 (1.33, 1.79) | 1.48 (1.31, 1.68)              | 1.55 (1.37, 1.76) | 1.44 (1.28, 1.62)  | 1.53 (1.35, 1.73) |
|                                              | East Midlands          | 2.18 (1.69, 2.81)  | 2.38 (1.84, 3.09) | 2.12 (1.70, 2.65)              | 2.36 (1.88, 2.96) | 2.16 (1.75, 2.67)  | 2.43 (1.96, 3.02) |
|                                              | West Midlands          | 1.64 (1.54, 1.75)  | 1.72 (1.61, 1.84) | 1.61 (1.53, 1.70)              | 1.73 (1.63, 1.83) | 1.55 (1.47, 1.63)  | 1.67 (1.58, 1.76) |
|                                              | East of England        | 1.75 (1.63, 1.88)  | 1.57 (1.46, 1.69) | 1.65 (1.55, 1.75)              | 1.49 (1.40, 1.58) | 1.65 (1.56, 1.74)  | 1.49 (1.41, 1.58) |
|                                              | South West             | 1.43 (1.34, 1.52)  | 1.43 (1.33, 1.52) | 1.48 (1.41, 1.56)              | 1.49 (1.41, 1.57) | 1.49 (1.42, 1.57)  | 1.51 (1.43, 1.59) |
|                                              | South Central          | 1.45 (1.37, 1.53)  | 1.28 (1.21, 1.36) | 1.54 (1.47, 1.62)              | 1.41 (1.34, 1.48) | 1.51 (1.44, 1.58)  | 1.38 (1.32, 1.45) |
| South East Coast                             | 1.33 (1.26, 1.41)      | 1.19 (1.12, 1.26)  | 1.33 (1.26, 1.39) | 1.24 (1.17, 1.30)              | 1.30 (1.24, 1.36) | 1.21 (1.15, 1.27)  |                   |
| Ethnicity                                    | White                  | 1                  | 1                 | 1                              | 1                 | 1                  | 1                 |
|                                              | South Asian            | 0.76 (0.71, 0.81)  | 0.83 (0.78, 0.88) | 0.78 (0.74, 0.83)              | 0.84 (0.79, 0.88) | 0.78 (0.75, 0.82)  | 0.84 (0.80, 0.89) |
|                                              | Black                  | 0.45 (0.41, 0.48)  | 0.61 (0.56, 0.67) | 0.46 (0.43, 0.50)              | 0.61 (0.57, 0.66) | 0.47 (0.44, 0.51)  | 0.63 (0.59, 0.67) |
|                                              | Mixed                  | 0.65 (0.57, 0.74)  | 0.72 (0.63, 0.83) | 0.64 (0.57, 0.71)              | 0.70 (0.62, 0.79) | 0.63 (0.57, 0.70)  | 0.69 (0.62, 0.77) |
|                                              | Other                  | 0.65 (0.59, 0.72)  | 0.68 (0.62, 0.75) | 0.66 (0.61, 0.71)              | 0.69 (0.63, 0.74) | 0.65 (0.61, 0.70)  | 0.68 (0.63, 0.74) |
| Maternal age, years                          | <20                    | 0.79 (0.72, 0.87)  | 0.81 (0.73, 0.89) | 0.73 (0.67, 0.79)              | 0.73 (0.68, 0.79) | 0.74 (0.68, 0.79)  | 0.74 (0.69, 0.80) |
|                                              | 20-24                  | 1                  | 1                 | 1                              | 1                 | 1                  | 1                 |
|                                              | 25-29                  | 1.27 (1.21, 1.34)  | 1.29 (1.22, 1.36) | 1.28 (1.23, 1.34)              | 1.30 (1.25, 1.37) | 1.26 (1.21, 1.32)  | 1.28 (1.23, 1.34) |
|                                              | 30-35                  | 1.54 (1.46, 1.62)  | 1.55 (1.47, 1.64) | 1.55 (1.49, 1.62)              | 1.57 (1.50, 1.65) | 1.54 (1.47, 1.60)  | 1.55 (1.48, 1.62) |
|                                              | ≥35                    | 1.36 (1.29, 1.44)  | 1.42 (1.34, 1.51) | 1.41 (1.35, 1.48)              | 1.48 (1.41, 1.55) | 1.38 (1.32, 1.44)  | 1.44 (1.37, 1.51) |
| Number of children                           | 0                      | 1                  | 1                 | 1                              | 1                 | 1                  | 1                 |
|                                              | 1                      | 0.67 (0.65, 0.70)  | 0.65 (0.63, 0.68) | 0.69 (0.66, 0.71)              | 0.67 (0.65, 0.69) | 0.70 (0.67, 0.72)  | 0.68 (0.66, 0.70) |
|                                              | 2                      | 0.47 (0.45, 0.49)  | 0.47 (0.45, 0.50) | 0.50 (0.48, 0.52)              | 0.49 (0.47, 0.51) | 0.50 (0.48, 0.52)  | 0.50 (0.48, 0.52) |
|                                              | ≥3                     | 0.35 (0.33, 0.37)  | 0.37 (0.35, 0.40) | 0.38 (0.36, 0.40)              | 0.39 (0.37, 0.42) | 0.39 (0.37, 0.41)  | 0.40 (0.38, 0.42) |
| Body mass index (BMI)                        | <18.5                  | 0.71 (0.64, 0.77)  |                   | 0.69 (0.64, 0.75)              |                   | 0.71 (0.66, 0.77)  |                   |
|                                              | 18.5-24.9              | 1                  |                   | 1                              |                   | 1                  |                   |
|                                              | 25.0-29.9              | 1.01 (0.96, 1.05)  |                   | 0.97 (0.94, 1.01)              |                   | 0.98 (0.94, 1.01)  |                   |
|                                              | ≥30                    | 0.82 (0.78, 0.86)  |                   | 0.82 (0.79, 0.85)              |                   | 0.82 (0.79, 0.85)  |                   |

*Note:* All models include women who registered in first trimester and exclude those with missing ethnicity; minimally adjusted models of BMI excludes women with missing BMI

*Abbreviations:* UK, United Kingdom; IMD, Index of Multiple Deprivation; BMI, body mass index

**Supplementary Table 6: Sensitivity analyses expanding definition of inclusion criteria for the influenza vaccine uptake models: registration by end of pregnancy, including pregnancies without known outcomes, extending influenza season to March, compared to primary analyses**

|                     |                        | Primary analyses   |                   | Registered by end of pregnancy |                   | Including pregnancies without known outcomes |                   | Extending influenza season through March |                   |
|---------------------|------------------------|--------------------|-------------------|--------------------------------|-------------------|----------------------------------------------|-------------------|------------------------------------------|-------------------|
|                     |                        | Minimally adjusted | Fully adjusted    | Minimally adjusted             | Fully adjusted    | Minimally adjusted                           | Fully adjusted    | Minimally adjusted                       | Fully adjusted    |
| N                   |                        | 140,141            | 140,141           | 153,782                        | 153,782           | 191,950                                      | 191,950           | 140,141                                  | 140,141           |
| Season              | 2010                   | 1                  | 1                 | 1                              | 1                 | 1                                            | 1                 | 1                                        | 1                 |
|                     | 2011                   | 0.89 (0.86, 0.92)  | 0.89 (0.86, 0.92) | 0.89 (0.86, 0.92)              | 0.89 (0.86, 0.92) | 0.92 (0.89, 0.95)                            | 0.92 (0.89, 0.94) | 0.93 (0.90, 0.96)                        | 0.93 (0.90, 0.96) |
|                     | 2012                   | 1.63 (1.58, 1.69)  | 1.65 (1.60, 1.71) | 1.62 (1.57, 1.67)              | 1.63 (1.58, 1.68) | 1.55 (1.51, 1.60)                            | 1.56 (1.52, 1.61) | 1.81 (1.76, 1.87)                        | 1.84 (1.78, 1.90) |
|                     | 2013                   | 1.40 (1.35, 1.45)  | 1.40 (1.35, 1.45) | 1.41 (1.36, 1.45)              | 1.41 (1.36, 1.46) | 1.36 (1.32, 1.41)                            | 1.36 (1.32, 1.41) | 1.57 (1.51, 1.62)                        | 1.57 (1.51, 1.62) |
|                     | 2014                   | 1.69 (1.63, 1.76)  | 1.70 (1.63, 1.76) | 1.71 (1.65, 1.77)              | 1.72 (1.65, 1.78) | 1.64 (1.59, 1.70)                            | 1.63 (1.58, 1.69) | 1.88 (1.81, 1.95)                        | 1.89 (1.82, 1.96) |
|                     | 2015                   | 1.65 (1.58, 1.73)  | 1.68 (1.60, 1.76) | 1.67 (1.60, 1.75)              | 1.70 (1.63, 1.78) | 1.61 (1.54, 1.68)                            | 1.61 (1.55, 1.68) | 1.86 (1.78, 1.94)                        | 1.89 (1.81, 1.98) |
| IMD                 | Least deprived         | 1                  | 1                 | 1                              | 1                 | 1                                            | 1                 | 1                                        | 1                 |
|                     | 2                      | 0.90 (0.87, 0.93)  | 0.92 (0.89, 0.95) | 0.88 (0.86, 0.91)              | 0.90 (0.87, 0.94) | 0.87 (0.84, 0.90)                            | 0.89 (0.86, 0.92) | 0.90 (0.87, 0.93)                        | 0.91 (0.88, 0.95) |
|                     | 3                      | 0.84 (0.81, 0.86)  | 0.88 (0.85, 0.91) | 0.83 (0.81, 0.86)              | 0.87 (0.84, 0.90) | 0.83 (0.80, 0.85)                            | 0.87 (0.85, 0.90) | 0.83 (0.81, 0.86)                        | 0.87 (0.84, 0.90) |
|                     | 4                      | 0.71 (0.69, 0.74)  | 0.76 (0.74, 0.79) | 0.71 (0.69, 0.73)              | 0.76 (0.74, 0.79) | 0.71 (0.69, 0.74)                            | 0.78 (0.75, 0.80) | 0.70 (0.68, 0.73)                        | 0.75 (0.73, 0.78) |
|                     | Most deprived          | 0.67 (0.65, 0.70)  | 0.72 (0.70, 0.75) | 0.67 (0.65, 0.69)              | 0.72 (0.69, 0.74) | 0.69 (0.67, 0.71)                            | 0.76 (0.73, 0.78) | 0.67 (0.65, 0.69)                        | 0.71 (0.69, 0.74) |
| Region              | London                 | 1                  | 1                 | 1                              | 1                 | 1                                            | 1                 | 1                                        | 1                 |
|                     | North East             | 1.11 (1.02, 1.21)  | 1.21 (1.11, 1.31) | 1.14 (1.06, 1.24)              | 1.24 (1.14, 1.34) | 1.15 (1.07, 1.24)                            | 1.25 (1.16, 1.35) | 1.09 (1.01, 1.18)                        | 1.19 (1.09, 1.29) |
|                     | North West             | 1.37 (1.32, 1.42)  | 1.42 (1.36, 1.47) | 1.39 (1.34, 1.45)              | 1.44 (1.39, 1.50) | 1.42 (1.38, 1.47)                            | 1.48 (1.42, 1.53) | 1.38 (1.33, 1.44)                        | 1.44 (1.38, 1.50) |
|                     | Yorkshire & The Humber | 1.27 (1.18, 1.38)  | 1.26 (1.16, 1.37) | 1.32 (1.22, 1.43)              | 1.31 (1.21, 1.42) | 1.33 (1.24, 1.43)                            | 1.33 (1.23, 1.43) | 1.27 (1.17, 1.38)                        | 1.26 (1.17, 1.37) |
|                     | East Midlands          | 1.33 (1.21, 1.47)  | 1.40 (1.27, 1.55) | 1.34 (1.22, 1.47)              | 1.41 (1.29, 1.55) | 1.33 (1.23, 1.45)                            | 1.39 (1.28, 1.52) | 1.35 (1.23, 1.49)                        | 1.43 (1.30, 1.58) |
|                     | West Midlands          | 1.41 (1.35, 1.46)  | 1.43 (1.37, 1.49) | 1.42 (1.37, 1.48)              | 1.45 (1.39, 1.51) | 1.43 (1.38, 1.48)                            | 1.45 (1.40, 1.51) | 1.47 (1.41, 1.53)                        | 1.50 (1.44, 1.57) |
|                     | East of England        | 1.31 (1.26, 1.37)  | 1.24 (1.19, 1.30) | 1.31 (1.26, 1.37)              | 1.24 (1.19, 1.30) | 1.31 (1.26, 1.36)                            | 1.24 (1.19, 1.29) | 1.32 (1.26, 1.37)                        | 1.25 (1.20, 1.31) |
|                     | South West             | 1.25 (1.20, 1.31)  | 1.25 (1.20, 1.31) | 1.29 (1.24, 1.35)              | 1.29 (1.24, 1.35) | 1.34 (1.29, 1.39)                            | 1.34 (1.29, 1.39) | 1.27 (1.22, 1.32)                        | 1.27 (1.22, 1.33) |
|                     | South Central          | 1.42 (1.36, 1.47)  | 1.33 (1.28, 1.38) | 1.45 (1.40, 1.50)              | 1.36 (1.31, 1.41) | 1.47 (1.42, 1.52)                            | 1.38 (1.33, 1.43) | 1.43 (1.38, 1.48)                        | 1.34 (1.29, 1.40) |
|                     | South East Coast       | 1.06 (1.02, 1.10)  | 1.02 (0.98, 1.06) | 1.07 (1.04, 1.11)              | 1.03 (0.99, 1.07) | 1.11 (1.07, 1.15)                            | 1.07 (1.03, 1.11) | 1.05 (1.01, 1.09)                        | 1.01 (0.97, 1.05) |
| Ethnicity           | White                  | 1                  | 1                 | 1                              | 1                 | 1                                            | 1                 | 1                                        | 1                 |
|                     | South Asian            | 0.92 (0.88, 0.95)  | 0.99 (0.95, 1.03) | 0.92 (0.88, 0.95)              | 0.99 (0.95, 1.03) | 0.93 (0.90, 0.96)                            | 0.98 (0.95, 1.02) | 0.94 (0.91, 0.98)                        | 1.02 (0.98, 1.06) |
|                     | Black                  | 0.67 (0.64, 0.71)  | 0.83 (0.78, 0.88) | 0.68 (0.64, 0.71)              | 0.83 (0.78, 0.88) | 0.69 (0.65, 0.72)                            | 0.83 (0.79, 0.87) | 0.67 (0.64, 0.71)                        | 0.83 (0.79, 0.88) |
|                     | Mixed                  | 0.84 (0.77, 0.92)  | 0.91 (0.83, 0.99) | 0.78 (0.72, 0.85)              | 0.84 (0.77, 0.92) | 0.79 (0.73, 0.86)                            | 0.86 (0.79, 0.93) | 0.83 (0.76, 0.91)                        | 0.90 (0.82, 0.99) |
|                     | Other                  | 0.79 (0.73, 0.84)  | 0.85 (0.79, 0.91) | 0.75 (0.70, 0.80)              | 0.81 (0.76, 0.86) | 0.77 (0.73, 0.82)                            | 0.83 (0.78, 0.88) | 0.80 (0.75, 0.85)                        | 0.86 (0.80, 0.92) |
| Maternal age, years | <20                    | 0.87 (0.81, 0.92)  | 0.87 (0.82, 0.93) | 0.87 (0.82, 0.93)              | 0.87 (0.82, 0.93) | 0.68 (0.65, 0.72)                            | 0.68 (0.64, 0.71) | 0.88 (0.82, 0.93)                        | 0.88 (0.83, 0.94) |
|                     | 20-24                  | 1                  | 1                 | 1                              | 1                 | 1                                            | 1                 | 1                                        | 1                 |
|                     | 25-29                  | 1.13 (1.09, 1.17)  | 1.12 (1.08, 1.16) | 1.14 (1.10, 1.18)              | 1.13 (1.10, 1.17) | 1.24 (1.20, 1.28)                            | 1.25 (1.21, 1.29) | 1.13 (1.09, 1.17)                        | 1.13 (1.09, 1.17) |
|                     | 30-35                  | 1.22 (1.18, 1.26)  | 1.21 (1.17, 1.25) | 1.24 (1.20, 1.28)              | 1.23 (1.19, 1.27) | 1.36 (1.32, 1.41)                            | 1.38 (1.34, 1.42) | 1.23 (1.19, 1.27)                        | 1.22 (1.17, 1.26) |
|                     | ≥35                    | 1.17 (1.12, 1.21)  | 1.18 (1.13, 1.22) | 1.19 (1.15, 1.23)              | 1.20 (1.15, 1.24) | 1.18 (1.14, 1.21)                            | 1.21 (1.17, 1.25) | 1.16 (1.12, 1.21)                        | 1.18 (1.14, 1.23) |
|                     | 0                      | 1                  | 1                 | 1                              | 1                 | 1                                            | 1                 | 1                                        | 1                 |

|                                                                                                                                                                                                        |           |                   |                   |                   |                   |                   |                   |                   |                   |
|--------------------------------------------------------------------------------------------------------------------------------------------------------------------------------------------------------|-----------|-------------------|-------------------|-------------------|-------------------|-------------------|-------------------|-------------------|-------------------|
| Number of children                                                                                                                                                                                     | 1         | 0.80 (0.78, 0.82) | 0.80 (0.78, 0.82) | 0.84 (0.82, 0.86) | 0.83 (0.81, 0.85) | 0.87 (0.85, 0.89) | 0.86 (0.84, 0.88) | 0.79 (0.77, 0.80) | 0.78 (0.76, 0.80) |
|                                                                                                                                                                                                        | 2         | 0.71 (0.68, 0.73) | 0.71 (0.69, 0.74) | 0.75 (0.72, 0.77) | 0.74 (0.72, 0.77) | 0.72 (0.70, 0.75) | 0.71 (0.68, 0.73) | 0.69 (0.67, 0.71) | 0.69 (0.67, 0.72) |
|                                                                                                                                                                                                        | ≥3        | 0.61 (0.58, 0.63) | 0.62 (0.59, 0.65) | 0.64 (0.61, 0.67) | 0.65 (0.62, 0.68) | 0.63 (0.61, 0.66) | 0.63 (0.60, 0.66) | 0.59 (0.56, 0.61) | 0.60 (0.57, 0.63) |
| Clinical risk group                                                                                                                                                                                    | No        | 1                 | 1                 | 1                 | 1                 | 1                 | 1                 | 1                 | 1                 |
|                                                                                                                                                                                                        | Yes       | 1.69 (1.62, 1.76) | 1.70 (1.63, 1.77) | 1.73 (1.66, 1.80) | 1.73 (1.66, 1.80) | 1.98 (1.91, 2.06) | 2.00 (1.93, 2.07) | 1.59 (1.53, 1.66) | 1.60 (1.54, 1.67) |
| BMI                                                                                                                                                                                                    | <18.5     | 0.85 (0.80, 0.90) |                   | 0.84 (0.79, 0.89) |                   | 0.84 (0.79, 0.88) |                   | 0.93 (0.88, 0.98) |                   |
|                                                                                                                                                                                                        | 18.5-24.9 | 1                 |                   | 1                 |                   | 1                 |                   | 1                 |                   |
|                                                                                                                                                                                                        | 25.0-29.9 | 1.04 (1.01, 1.07) |                   | 1.03 (1.01, 1.06) |                   | 1.04 (1.02, 1.07) |                   | 0.98 (0.95, 1.00) |                   |
|                                                                                                                                                                                                        | ≥30       | 1.00 (0.97, 1.03) |                   | 0.99 (0.96, 1.02) |                   | 1.03 (1.00, 1.06) |                   | 0.90 (0.87, 0.92) |                   |
| <i>Note:</i> All models include women who registered in first trimester, and exclude those with outcome unknown and missing ethnicity; minimally adjusted model of BMI excludes women with missing BMI |           |                   |                   |                   |                   |                   |                   |                   |                   |
| <i>Abbreviations:</i> UK, United Kingdom; IMD, Index of Multiple Deprivation; BMI, body mass index                                                                                                     |           |                   |                   |                   |                   |                   |                   |                   |                   |



**Supplementary Table 7: Secondary analysis of subsequent pertussis vaccine uptake among women who had received pertussis vaccination in their first eligible pregnancy and had a second eligible pregnancy within the study period (N=3,111)**

|                                                                                      |                           | Total<br>(column %) | Received<br>pertussis<br>vaccine in<br>second<br>pregnancy<br>(row %) | Minimally<br>adjusted model<br>OR of receiving<br>vaccine in second<br>pregnancy (95%<br>CI) | Fully adjusted<br>model<br>OR of receiving<br>vaccine in second<br>pregnancy (95%<br>CI) |
|--------------------------------------------------------------------------------------|---------------------------|---------------------|-----------------------------------------------------------------------|----------------------------------------------------------------------------------------------|------------------------------------------------------------------------------------------|
| N                                                                                    |                           | 3,111               | 1,877 (60.3)                                                          |                                                                                              |                                                                                          |
| Year of first<br>pregnancy                                                           | 2012                      | 550 (17.7)          | 380 (69.1)                                                            | 1                                                                                            | 1                                                                                        |
|                                                                                      | 2013                      | 1,912 (61.5)        | 1,264 (66.1)                                                          | 0.87 (0.71-1.07)                                                                             | 0.70 (0.56-0.87)                                                                         |
|                                                                                      | 2014-15                   | 649 (20.9)          | 233 (35.9)                                                            | 0.25 (0.20-0.32)                                                                             | 0.14 (0.10-0.18)                                                                         |
| Index of<br>multiple<br>deprivation<br>(IMD) quintile                                | Least deprived            | 857 (27.6)          | 539 (62.9)                                                            | 1                                                                                            | 1                                                                                        |
|                                                                                      | 2                         | 539 (17.3)          | 326 (60.5)                                                            | 0.90 (0.71-1.13)                                                                             | 0.91 (0.71-1.16)                                                                         |
|                                                                                      | 3                         | 604 (19.4)          | 381 (63.1)                                                            | 1.03 (0.92-1.28)                                                                             | 1.06 (0.83-1.35)                                                                         |
|                                                                                      | 4                         | 579 (18.6)          | 337 (58.2)                                                            | 0.82(0.66-1.02)                                                                              | 0.89 (0.70-1.15)                                                                         |
|                                                                                      | Most deprived             | 532 (17.1)          | 294 (55.3)                                                            | 0.72 (0.57-0.90)                                                                             | 0.77 (0.59-1.01)                                                                         |
| Region                                                                               | London                    | 453 (14.6)          | 260 (57.4)                                                            | 1                                                                                            | 1                                                                                        |
|                                                                                      | North East                | 35 (1.1)            | 22 (62.9)                                                             | 1.25 (0.65-2.83)                                                                             | 2.08 (0.95-4.58)                                                                         |
|                                                                                      | North West                | 390 (12.5)          | 240 (61.5)                                                            | 1.16 (0.87-1.55)                                                                             | 1.29 (0.95-1.77)                                                                         |
|                                                                                      | Yorkshire &<br>The Humber | 31 (1.0)            | 14 (45.2)                                                             | 0.56 (0.27-1.19)                                                                             | 0.73 (0.33-1.62)                                                                         |
|                                                                                      | East Midlands             | 0                   | 0                                                                     | -                                                                                            | -                                                                                        |
|                                                                                      | West Midlands             | 375 (12.1)          | 229 (61.1)                                                            | 1.13 (0.85-1.51)                                                                             | 1.33 (0.97-1.81)                                                                         |
|                                                                                      | East of England           | 296 (9.5)           | 201 (67.9)                                                            | 1.57 (1.14-2.15)                                                                             | 1.54 (1.10-2.16)                                                                         |
|                                                                                      | South West                | 388 (12.5)          | 239 (61.6)                                                            | 1.19 (0.98-1.58)                                                                             | 1.31 (0.96-1.79)                                                                         |
|                                                                                      | South Central             | 562 (18.1)          | 360 (64.1)                                                            | 1.33 (1.02-1.73)                                                                             | 1.31 (0.99-1.74)                                                                         |
|                                                                                      | South East<br>Coast       | 581 (18.7)          | 312 (53.7)                                                            | 0.90 (0.69-1.16)                                                                             | 0.99 (0.75-1.31)                                                                         |
| Ethnicity                                                                            | White                     | 2,732 (87.8)        | 1,657 (60.7)                                                          | 1                                                                                            | 1                                                                                        |
|                                                                                      | South Asian               | 204 (6.6)           | 114 (55.9)                                                            | 0.82 (0.61-1.10)                                                                             | 0.78 (0.57-1.07)                                                                         |
|                                                                                      | Black                     | 84 (2.7)            | 49 (58.3)                                                             | 1.05 (0.66-1.67)                                                                             | 1.09 (0.66-1.80)                                                                         |
|                                                                                      | Mixed                     | 33 (1.1)            | 20 (60.6)                                                             | 0.94 (0.46-1.94)                                                                             | 1.14 (0.63-2.07)                                                                         |
|                                                                                      | Other                     | 58 (1.9)            | 37 (63.8)                                                             | 1.25 (0.71-2.20)                                                                             | 0.97 (0.46-2.06)                                                                         |
| Maternal age,<br>years                                                               | <20                       | 102 (3.2)           | 40 (39.2)                                                             | 0.48 (0.30-0.75)                                                                             | 0.48 (0.30-0.77)                                                                         |
|                                                                                      | 20-24                     | 505 (16.2)          | 290 (57.4)                                                            | 1                                                                                            | 1                                                                                        |
|                                                                                      | 25-29                     | 1,002 (32.2)        | 592 (59.1)                                                            | 1.07 (0.85-1.34)                                                                             | 1.09 (0.86-1.39)                                                                         |
|                                                                                      | 30-34                     | 1,048 (33.7)        | 669 (63.8)                                                            | 1.32 (1.05-1.65)                                                                             | 1.26 (0.98-1.61)                                                                         |
|                                                                                      | ≥35                       | 454 (14.6)          | 286 (63.0)                                                            | 1.29 (0.99-1.69)                                                                             | 1.26 (0.94-1.69)                                                                         |
| Number of<br>children                                                                | 0                         | 1,936 (62.2)        | 1,224 (63.2)                                                          | 1                                                                                            | 1                                                                                        |
|                                                                                      | 1                         | 714 (23.0)          | 405 (56.7)                                                            | 0.78 (0.65-0.94)                                                                             | 0.75 (0.62-0.91)                                                                         |
|                                                                                      | 2                         | 264 (8.5)           | 149 (56.4)                                                            | 0.72 (0.55-0.95)                                                                             | 0.64 (0.48-0.85)                                                                         |
|                                                                                      | ≥3                        | 197 (6.3)           | 99 (50.3)                                                             | 0.56 (0.42-0.76)                                                                             | 0.50 (0.36-0.69)                                                                         |
| Pregnancy<br>interval (days<br>from end of first<br>pregnancy to<br>start of second) | 0-179                     | 416 (13.4)          | 227 (54.6)                                                            | 1                                                                                            | 1                                                                                        |
|                                                                                      | 180-359                   | 749 (24.1)          | 476 (63.6)                                                            | 1.25 (0.96-1.63)                                                                             | 1.11 (0.85-1.45)                                                                         |
|                                                                                      | 360-539                   | 1,004 (32.3)        | 695 (69.2)                                                            | 1.33 (1.03-1.71)                                                                             | 1.13 (0.86-1.47)                                                                         |
|                                                                                      | 540-719                   | 624 (20.1)          | 373 (59.8)                                                            | 0.65 (0.49-0.85)                                                                             | 0.54 (0.41-0.73)                                                                         |
|                                                                                      | 720+                      | 318 (10.2)          | 106 (33.3)                                                            | 0.19 (0.14-0.27)                                                                             | 0.16 (0.11-0.22)                                                                         |

*Note:* Among 3,363 women with two eligible pregnancies during follow up, excluded 2 with implausible (<0 days) spacing between the end of the first pregnancy and start of the second, and 250 with missing ethnicity data.
